# Supplementary material for: Characterizing the Human Mycobiota: A Comparison of Small Subunit rRNA, ITS1, ITS2, and Large Subunit rRNA Genomic Targets
Source: PubMed Central journal article supplement (PMC6157398; doi:10.3389/fmicb.2018.02208), 2018-09-19
Supplement: Image_1.pdf [file Image_1.pdf]

| Mock community Full taxonomy                                                                                                                 | Source              | PCR | ~Amplicon length (bp) | UNITE Classification                               | RDP Classification                             | Rel. %                     |
|----------------------------------------------------------------------------------------------------------------------------------------------|---------------------|-----|-----------------------|----------------------------------------------------|------------------------------------------------|----------------------------|
| d:Fungi,p:Ascomycota,c:Dothideomycetes,o:Pleosporales,f:Pleosporaceae,g:Alternaria,s:Alternaria_alternata                                    | Wild type (LabPLUS) | ++  | 350                   | d:Fungi_Unclassified                               | c:Dothideomycetes,s:Alternaria_alternata       | 2.0%                       |
| d:Fungi,p:Ascomycota,c:Dothideomycetes,o:Capnodiales,f:Davidiellaceae,g:Cladosporium,s:Cladosporium_sphaeospermum                            | Wild type (LabPLUS) | ++  | 380                   | p:Ascomycota_Unclassified                          | c:Dothideomycetes,s:Cladosporium_halotolerans  | 1.2%                       |
| d:Fungi,p:Ascomycota,c:Eurotiomycetes,o:Eurotiales,f:Trichocomaceae,g:Aspergillus,s:Aspergillus_brasiliensis                                 | ATCC® 16404™        | ++  | 350                   | p:Ascomycota_Unclassified*                         | c:Eurotiomycetes,g:Aspergillus*                | 9% (incl. A. niger)        |
| d:Fungi,p:Ascomycota,c:Eurotiomycetes,o:Eurotiales,f:Trichocomaceae,g:Aspergillus,s:Aspergillus_flavus                                       | Wild type (LabPLUS) | +++ | 380                   | c:Eurotiomycetes,g:Aspergillus                     | c:Eurotiomycetes,s:Aspergillus_flavus          | 3.6%                       |
| d:Fungi,p:Ascomycota,c:Eurotiomycetes,o:Eurotiales,f:Trichocomaceae,g:Aspergillus,s:Aspergillus_fumigatus                                    | Wild type (LabPLUS) | +++ | 380                   | c:Eurotiomycetes,s:Aspergillus_fumigatus           | c:Eurotiomycetes,s:Aspergillus_fumigatus       | 5.8%                       |
| d:Fungi,p:Ascomycota,c:Eurotiomycetes,o:Eurotiales,f:Trichocomaceae,g:Aspergillus,s:Aspergillus_niger                                        | ATCC® 9642™         | +++ | 380                   | p:Ascomycota_Unclassified*                         | c:Eurotiomycetes,g:Aspergillus*                | 9% (incl. A. brasiliensis) |
| d:Fungi,p:Ascomycota,c:Eurotiomycetes,o:Chaetothyriales,f:Herpotrichiellaceae,g:Exophiala,s:Exophiala_spinifera                              | ATCC® 14488™        | +++ | 400                   | c:Eurotiomycetes,s:Exophiala_exophialae            | c:Eurotiomycetes,s:Exophiala_spinifera         | 1.8%                       |
| d:Fungi,p:Ascomycota,c:Eurotiomycetes,o:Eurotiales,f:Trichocomaceae,g:Penicillium,s:Penicillium_chrysogenum                                  | ATCC® 10002™        | +++ | 400                   | c:Eurotiomycetes,g:Penicillium                     | c:Eurotiomycetes,g:Eupenicillium               | 2.3%                       |
| d:Fungi,p:Ascomycota,c:Eurotiomycetes,o:Onygenales,f:Anthroderrmaceae,g:Trichophyton,s:Trichophyton_mentagrophytes                           | ATCC® 9533™         | +++ | 500                   | c:Eurotiomycetes,s:Trichophyton_mentagrophytes     | c:Eurotiomycetes,g:Arthroderma                 | 4.1%                       |
| d:Fungi,p:Ascomycota,c:Saccharomycetes,o:Saccharomycetales,f:Saccharomycetales_fam_Incertae_sedis,g:Candida,s:Candida_albicans               | ATCC® 10231™        | +++ | 300                   | c:Saccharomycetes,g:Candida                        | c:Saccharomycetes,g:Candida                    | 13.8%                      |
| d:Fungi,p:Ascomycota,c:Saccharomycetes,o:Saccharomycetales,f:Saccharomycetales_fam_Incertae_sedis,g:Candida,s:Candida_glabrata               | ATCC® 90030™        | +++ | 600                   | c:Saccharomycetes,o:Saccharomycetales_Unclassified | c:Saccharomycetes,s:Candida_glabrata           | 1.6%                       |
| d:Fungi,p:Ascomycota,c:Saccharomycetes,o:Saccharomycetales,f:Saccharomycetales_fam_Incertae_sedis,g:Candida,s:Candida_parapsilosis           | ATCC® 22019™        | +++ | 300                   | c:Saccharomycetes,s:Candida_parapsilosis           | c:Saccharomycetes,s:Candida_parapsilosis       | 8.5%                       |
| d:Fungi,p:Ascomycota,c:Saccharomycetes,o:Saccharomycetales,f:Saccharomycetales_fam_Incertae_sedis,g:Candida,s:Candida_tropicalis             | ATCC® 13802™        | ++  | 350                   | c:Saccharomycetes,s:Candida_tropicalis             | c:Saccharomycetes,s:Candida_tropicalis         | 0.8%                       |
| d:Fungi,p:Ascomycota,c:Saccharomycetes,o:Saccharomycetales,f:Saccharomycetales_fam_Incertae_sedis,g:Yarrowia,s:Yarrowia_lipolytica           | ATCC® 9773™         | +   | 250                   | c:Saccharomycetes,s:Yarrowia_lipolytica            | d:Fungi_unclassified                           | 0.0%                       |
| d:Fungi,p:Ascomycota,c:Saccharomycetes,o:Saccharomycetales,f:Saccharomycetales_fam_Incertae_sedis,g:Saccharomyces,s:Saccharomyces_cerevisiae | Wild type (UoA)     | +++ | 520                   | c:Saccharomycetes,g:Saccharomyces                  | c:Saccharomycetes,s:Saccharomyces_cerevisiae   | 3.1%                       |
| d:Fungi,p:Ascomycota,c:Sordariomycetes,o:Hypocreales,f:Nectriaceae,g:Fusarium,s:Fusarium_solani                                              | Wild type (LabPLUS) | +++ | 380                   | d:Fungi_Unclassified                               | c:Sordariomycetes,f:Nectriaceae_Unclassified   | 4.8%                       |
| d:Fungi,p:Basidiomycota,c:Tremellomycetes,o:Tremellales,f:Tremellales_fam_Incertae_sedis,g:Cryptococcus,s:Cryptococcus_neofomans             | ATCC® 32045™        | +++ | 350                   | c:Tremellomycetes,s:Cryptococcus_neofomans         | c:Tremellomycetes,g:Filobasidiella             | 4.6%                       |
| d:Fungi,p:Basidiomycota,c:Tremellomycetes,o:Trichosporales,f:Trichosporonaceae,g:Trichosporon,s:Trichosporon_dermatis                        | ATCC® 204094™       | +++ | 300                   | c:Tremellomycetes,g:Trichosporon                   | c:Tremellomycetes,s:Trichosporon_dermatis      | 33.0%                      |
| d:Fungi,p:Basidiomycota,c:Exobasidiomycetes,o:Malasseziales,f:Malasseziaceae,g:Malassezia,s:Malassezia_furfur                                | NZRM 3493           | -   | -                     | c:Exobasidiomycetes,s:Malassezia_furfur            | c:Exobasidiomycetes,s:Malassezia_furfur        | 0.0%                       |
| d:Fungi,p:Basidiomycota,c:Exobasidiomycetes,o:Malasseziales,f:Malasseziaceae,g:Malassezia,s:Malassezia_globosa                               | ATCC® MYA4612™      | +   | 450                   | c:Exobasidiomycetes,g:Malassezia                   | c:Exobasidiomycetes,s:Malassezia_globosa       | < 0.1%                     |
| d:Fungi,p:Basidiomycota,c:Exobasidiomycetes,o:Malasseziales,f:Malasseziaceae,g:Malassezia,s:Malassezia_pachydermatis                         | Wild type (LabPLUS) | -   | -                     | c:Exobasidiomycetes,g:Malassezia                   | c:Exobasidiomycetes,s:Malassezia_pachydermatis | 0.0%                       |

+++ Strong visible band  
 ++ Moderate visible band  
 + Weak visible band  
 - No visible band

Correct species (incl. teleomorph)  
 Correct genus (incl. teleomorph)  
 Correct class, incorrect or unclassified to genus  
 Not classified to class  
 Incorrect class

Over-represented taxa  
 Under-represented taxa

**Image 1. Human mycobiota mock community: ITS1.** Full taxonomy and isolate source for the 21 species that comprised the mock community, together with details of PCR band intensity (visualised via an agarose gel) (**PCR**), approximate amplicon length (bp) including primers and adapters (**Amplicon length (bp)**), taxonomic classifications of sequences based on reference databases (**Reference Classification**), and the relative abundance of sequences for each taxon when sequenced as an equal parts mixed community (**Rel. %**). ATCC = American Type Culture Collection. NZRM = New Zealand Reference Culture Collection. UoA = University of Auckland. \**A. brasiliensis* and *A. niger* shared the same ZOTU for each of ITS1, ITS2, and LSU (i.e. had identical sequences).



| Mock_community_Full_taxonomy                                                                                                       | Source              | PCR | ~Amplicon length (bp) | SILVA Classification                               | Rel. % |
|------------------------------------------------------------------------------------------------------------------------------------|---------------------|-----|-----------------------|----------------------------------------------------|--------|
| d:Fungi,p:Ascomycota,c:Dothideomycetes,o:Pezizales,f:Pezizaceae,g:Alternaria,s:Alternaria_alternata                                | Wild type (LabPLUS) | +   | 650                   | c:Dothideomycetes_Unclassified                     |        |
| d:Fungi,p:Ascomycota,c:Dothideomycetes,o:Capnodiales,f:Davidiellaceae,g:Cladosporium,s:Cladosporium_sphaeospermum                  | Wild type (LabPLUS) | +   | 650                   | p:Ascomycota_Unclassified                          |        |
| d:Fungi,p:Ascomycota,c:Eurotiomycetes,o:Eurotiales,f:Trichocomaceae,g:Aspergillus,s:Aspergillus_brasiliensis                       | ATCC® 16404™        | +   | 600                   | Mixed classification: split across numerous Zotus™ |        |
| d:Fungi,p:Ascomycota,c:Eurotiomycetes,o:Eurotiales,f:Trichocomaceae,g:Aspergillus,s:Aspergillus_flavus                             | Wild type (LabPLUS) | +   | 650                   | c:Eurotiomycetes,s:Aspergillus_sojae               |        |
| d:Fungi,p:Ascomycota,c:Eurotiomycetes,o:Eurotiales,f:Trichocomaceae,g:Aspergillus,s:Aspergillus_fumigatus                          | Wild type (LabPLUS) | +   | 650                   | c:Eurotiomycetes_Unclassified                      |        |
| d:Fungi,p:Ascomycota,c:Eurotiomycetes,o:Eurotiales,f:Trichocomaceae,g:Aspergillus,s:Aspergillus_niger                              | ATCC® 9642™         | ++  | 650                   | c:Eurotiomycetes,g:Aspergillus                     |        |
| d:Fungi,p:Ascomycota,c:Eurotiomycetes,o:Chaetothiales,f:Herpotrichiellaceae,g:Exophiala,s:Exophiala_spinifera                      | ATCC® 14488™        | +   | 650                   | c:Eurotiomycetes_Unclassified                      |        |
| d:Fungi,p:Ascomycota,c:Eurotiomycetes,o:Eurotiales,f:Trichocomaceae,g:Penicillium,s:Penicillium_chrysogenum                        | ATCC® 10002™        | +   | 650                   | c:Eurotiomycetes,s:Penicillium_camemberti          |        |
| d:Fungi,p:Ascomycota,c:Eurotiomycetes,o:Onygenales,f:Arthrodermataceae,g:Trichophyton,s:Trichophyton_mentagrophytes                | ATCC® 9533™         | ++  | 650                   | c:Eurotiomycetes,g:Trichophyton                    |        |
| d:Fungi,p:Ascomycota,c:Saccharomycetes,o:Saccharomycetales,f:Saccharomycetales_fam_Incertae_sedis,g:Candida,s:Candida_albicans     | ATCC® 10231™        | ++  | 650                   | c:Saccharomycetes_Unclassified*                    |        |
| d:Fungi,p:Ascomycota,c:Saccharomycetes,o:Saccharomycetales,f:Saccharomycetales_fam_Incertae_sedis,g:Candida,s:Candida_glabrata     | ATCC® 90030™        | +++ | 650                   | c:Saccharomycetes_Unclassified                     |        |
| d:Fungi,p:Ascomycota,c:Saccharomycetes,o:Saccharomycetales,f:Saccharomycetales_fam_Incertae_sedis,g:Candida,s:Candida_parapsilosis | ATCC® 22019™        | +++ | 650                   | c:Saccharomycetes_Unclassified*                    |        |
| d:Fungi,p:Ascomycota,c:Saccharomycetes,o:Saccharomycetales,f:Saccharomycetales_fam_Incertae_sedis,g:Candida,s:Candida_tropicalis   | ATCC® 13802™        | +++ | 650                   | c:Saccharomycetes_Unclassified                     |        |
| d:Fungi,p:Ascomycota,c:Saccharomycetes,o:Saccharomycetales,f:Saccharomycetales_fam_Incertae_sedis,g:Yarrowia,s:Yarrowia_lipolytica | ATCC® 9773™         | +++ | 580                   | c:Saccharomycetes,s:Yarrowia_lipolytica            |        |
| d:Fungi,p:Ascomycota,c:Saccharomycetes,o:Saccharomycetales,f:Saccharomycetales_fam_Incertae_sedis,g:Yarrowia,s:Yarrowia_lipolytica | ATCC® 9773™         | +++ | 580                   | c:Saccharomycetes,s:Saccharomyces_cerevisiae       |        |
| d:Fungi,p:Ascomycota,c:Sordariomycetes,o:Hypocreales,f:Nectriaceae,g:Fusarium,s:Fusarium_solani                                    | Wild type (LabPLUS) | ++  | 650                   | d:Eukaryota_Unclassified                           |        |
| d:Fungi,p:Basidiomycota,c:Tremellomycetes,o:Tremellales,f:Tremellales_fam_Incertae_sedis,g:Cryptococcus,s:Cryptococcus_neoformans  | ATCC® 32045™        | +++ | 650                   | c:Tremellomycetes,s:Cryptococcus_gattii            |        |
| d:Fungi,p:Basidiomycota,c:Tremellomycetes,o:Trichosporonales,f:Trichosporonaceae,g:Trichosporon,s:Trichosporon_dermatis            | ATCC® 204094™       | +++ | 600                   | c:Tremellomycetes,g:Trichosporon                   |        |
| d:Fungi,p:Basidiomycota,c:Exobasidiomycetes,o:Malasseziales,f:Malasseziaceae,g:Malassezia,s:Malassezia_furfur                      | NZRM 3493           | +   | 650                   | c:Exobasidiomycetes_Unclassified                   |        |
| d:Fungi,p:Basidiomycota,c:Exobasidiomycetes,o:Malasseziales,f:Malasseziaceae,g:Malassezia,s:Malassezia_globosa                     | ATCC® MYA4612™      | ++  | 650                   | c:Exobasidiomycetes,s:Malassezia_globosa           |        |
| d:Fungi,p:Basidiomycota,c:Exobasidiomycetes,o:Malasseziales,f:Malasseziaceae,g:Malassezia,s:Malassezia_pachydermatis               | Wild type (LabPLUS) | +   | 650                   | c:Exobasidiomycetes,s:Malassezia_pachydermatis     |        |

+++ Strong visible band  
 ++ Moderate visible band  
 + Weak visible band  
 - No visible band

Correct species (incl. teleomorph)  
 Correct genus (incl. teleomorph)  
 Correct class, incorrect or unclassified to genus  
 Not classified to class  
 Incorrect class

**Supplementary material 1C. Human mycobiota mock community: SSU.** Full taxonomy and isolate source for the 21 species that comprised the mock community, together with details of PCR band intensity (visualised via an agarose gel) (**PCR**), approximate amplicon length (bp) including primers and adapters (**Amplicon length (bp)**), taxonomic classifications of sequences based on reference databases (**Reference Classification**), and the relative abundance of sequences for each taxon when sequenced as an equal parts mixed community (**Rel. %**) (not available for SSU data). ATCC = American Type Culture Collection. NZRM = New Zealand Reference Culture Collection. UoA = University of Auckland. \**C. albicans* and *C. parapsilosis* shared the same ZOTU for SSU. \*\**A. brasiliensis* was split across numerous ZOTUs for SSU sequences and had mixed classification.

| Mock_community_Full_taxonomy                                                                                                       | Source              | PCR | ~Amplicon length (bp) | SILVA Classification                      | RDP Classification                                 | Rel. %                       |
|------------------------------------------------------------------------------------------------------------------------------------|---------------------|-----|-----------------------|-------------------------------------------|----------------------------------------------------|------------------------------|
| d:Fungi,p:Ascomycota,c:Dothideomycetes,o:Pleosporales,f:Pleosporaceae,g:Alternaria,s:Alternaria_alternata                          | Wild type (LabPLUS) | ++  | 700                   | c:Dothideomycetes_Unclassified            | c:Dothideomycetes,g:Alternaria                     | 0.7%                         |
| d:Fungi,p:Ascomycota,c:Dothideomycetes,o:Capnodiales,f:Davidiellaceae,g:Cladosporium,s:Cladosporium_sphaeospermum                  | Wild type (LabPLUS) | ++  | 700                   | c:Dothideomycetes_Unclassified            | c:Dothideomycetes,g:Cladosporium_complex           | 0.8%                         |
| d:Fungi,p:Ascomycota,c:Eurotiomycetes,o:Eurotiales,f:Trichocomaceae,g:Aspergillus,s:Aspergillus_brasiliensis                       | ATCC® 16404™        | +   | 700                   | c:Eurotiomycetes,s:Aspergillus_niger*     | c:Agaricomycetes,g:Poria*                          | 7.5% (incl. A. niger)        |
| d:Fungi,p:Ascomycota,c:Eurotiomycetes,o:Eurotiales,f:Trichocomaceae,g:Aspergillus,s:Aspergillus_flavus                             | Wild type (LabPLUS) | +++ | 700                   | c:Eurotiomycetes,s:Aspergillus_oryzae     | c:Eurotiomycetes,f:Trichocomaceae_Unclassified     | 2.7%                         |
| d:Fungi,p:Ascomycota,c:Eurotiomycetes,o:Eurotiales,f:Trichocomaceae,g:Aspergillus,s:Aspergillus_fumigatus                          | Wild type (LabPLUS) | +++ | 700                   | c:Eurotiomycetes,s:Aspergillus_fumigatus  | c:Eurotiomycetes,g:Aspergillus                     | 4.6%                         |
| d:Fungi,p:Ascomycota,c:Eurotiomycetes,o:Eurotiales,f:Trichocomaceae,g:Aspergillus,s:Aspergillus_niger                              | ATCC® 9642™         | +++ | 700                   | c:Eurotiomycetes,s:Aspergillus_niger*     | c:Agaricomycetes,g:Poria*                          | 7.5% (incl. A. brasiliensis) |
| d:Fungi,p:Ascomycota,c:Eurotiomycetes,o:Chaetothyriales,f:Herpotrichiellaceae,g:Exophiala,s:Exophiala_spinifera                    | ATCC® 14488™        | ++  | 700                   | p:Ascomycota_Unclassified                 | c:Eurotiomycetes,f:Herpotrichiellaceae             | 0.6%                         |
| d:Fungi,p:Ascomycota,c:Eurotiomycetes,o:Eurotiales,f:Trichocomaceae,g:Penicillium,s:Penicillium_chrysogenum                        | ATCC® 10002™        | ++  | 750                   | c:Eurotiomycetes_Unclassified             | c:Eurotiomycetes,g:Penicillium                     | 1.9%                         |
| d:Fungi,p:Ascomycota,c:Eurotiomycetes,o:Onygenales,f:Arthrodermataceae,g:Trichophyton,s:Trichophyton_mentagrophytes                | ATCC® 9533™         | +++ | 700                   | c:Eurotiomycetes,s:Trichophyton_tonsurans | c:Eurotiomycetes,g:Arthroderma                     | 2.7%                         |
| d:Fungi,p:Ascomycota,c:Saccharomycetes,o:Saccharomycetales,f:Saccharomycetales_fam_Incertae_sedis,g:Candida,s:Candida_albicans     | ATCC® 10231™        | +++ | 650                   | c:Saccharomycetes,s:Candida_albicans      | c:Saccharomycetes,f:Saccharomycetales_Unclassified | 9.3%                         |
| d:Fungi,p:Ascomycota,c:Saccharomycetes,o:Saccharomycetales,f:Saccharomycetales_fam_Incertae_sedis,g:Candida,s:Candida_glabrata     | ATCC® 90030™        | +++ | 700                   | c:Saccharomycetes,s:Candida_glabrata      | c:Saccharomycetes,g:Nakaseomyces                   | 4.3%                         |
| d:Fungi,p:Ascomycota,c:Saccharomycetes,o:Saccharomycetales,f:Saccharomycetales_fam_Incertae_sedis,g:Candida,s:Candida_parapsilosis | ATCC® 22019™        | +++ | 650                   | c:Saccharomycetes,s:Candida_parapsilosis  | c:Saccharomycetes,g:Vanderwaltozyma                | 4.1%                         |
| d:Fungi,p:Ascomycota,c:Saccharomycetes,o:Saccharomycetales,f:Saccharomycetales_fam_Incertae_sedis,g:Candida,s:Candida_tropicalis   | ATCC® 13802™        | +   | 700                   | c:Saccharomycetes_Unclassified            | c:Saccharomycetes,g:Lodderomyces                   | 0.5%                         |
| d:Fungi,p:Ascomycota,c:Saccharomycetes,o:Saccharomycetales,f:Saccharomycetales_fam_Incertae_sedis,g:Yarrowia,s:Yarrowia_lipolytica | ATCC® 9773™         | +++ | 650                   | c:Saccharomycetes,s:Yarrowia_lipolytica   | c:Saccharomycetes,g:Yarrowia                       | 16.9%                        |
| d:Fungi,p:Ascomycota,c:Saccharomycetes,o:Saccharomycetales,f:Saccharomycetales_fam_Incertae_sedis,g:Hexapoda,s:Polistes_fuscatus   | Wild type (UoA)     | +++ | 650                   | c:Hexapoda,s:Polistes_fuscatus            | c:Saccharomycetes,g:Saccharomyces                  | 10.3%                        |
| d:Fungi,p:Ascomycota,c:Sordariomycetes,o:Hypocreales,f:Nectriaceae,g:Fusarium,s:Fusarium_solani                                    | Wild type (LabPLUS) | +++ | 700                   | c:Sordariomycetes_Unclassified            | c:Sordariomycetes,g:Nectria                        | 3.7%                         |
| d:Fungi,p:Basidiomycota,c:Tremellomycetes,o:Tremellales,f:Tremellales_fam_Incertae_sedis,g:Cryptococcus,s:Cryptococcus_neoformans  | ATCC® 32045™        | +++ | 750                   | c:Tremellomycetes,s:Cryptococcus_gattii   | c:Tremellomycetes,g:Cryptococcus                   | 4.7%                         |
| d:Fungi,p:Basidiomycota,c:Tremellomycetes,o:Trichosporales,f:Trichosporonaceae,g:Trichosporon,s:Trichosporon_dermatis              | ATCC® 204094™       | +++ | 700                   | c:Tremellomycetes_Unclassified            | c:Tremellomycetes,g:Asterotremella                 | 17.9%                        |
| d:Fungi,p:Basidiomycota,c:Exobasidiomycetes,o:Malasseziales,f:Malasseziaceae,g:Malassezia,s:Malassezia_furfur                      | NZRM 3493           | ++  | 750                   | c:Exobasidiomycetes,s:Malassezia          | c:Exobasidiomycetes,g:Malassezia                   | 0.6%                         |
| d:Fungi,p:Basidiomycota,c:Exobasidiomycetes,o:Malasseziales,f:Malasseziaceae,g:Malassezia,s:Malassezia_globosa                     | ATCC® MYA4612™      | +++ | 750                   | c:Exobasidiomycetes,s:Malassezia_globosa  | c:Exobasidiomycetes,g:Malassezia                   | 5.3%                         |
| d:Fungi,p:Basidiomycota,c:Exobasidiomycetes,o:Malasseziales,f:Malasseziaceae,g:Malassezia,s:Malassezia_pachydermatis               | Wild type (LabPLUS) | ++  | 750                   | c:Exobasidiomycetes,s:Malassezia          | c:Exobasidiomycetes,g:Malassezia                   | 1.2%                         |

+++ Strong visible band

++ Moderate visible band

+ Weak visible band

- No visible band

Correct species (incl. teleomorph)

Correct genus (incl. teleomorph)

Correct class, incorrect or unclassified to genus

Not classified to class

Incorrect class

Over-represented taxa

Under-represented taxa

**Supplementary material 1D. Human mycobiota mock community: LSU.** Full taxonomy and isolate source for the 21 species that comprised the mock community, together with details of PCR band intensity (visualised via an agarose gel) (**PCR**), approximate amplicon length (bp) including primers and adapters (**Amplicon length (bp)**), taxonomic classifications of sequences based on reference databases (**Reference Classification**), and the relative abundance of sequences for each taxon when sequenced as an equal parts mixed community (**Rel. %**). ATCC = American Type Culture Collection. NZRM = New Zealand Reference Culture Collection. UoA = University of Auckland. \**A. brasiliensis* and *A. niger* shared the same ZOTU for each of ITS1, ITS2, and LSU (i.e. had identical sequences).
