# Supplementary material for: Characterizing the Human Mycobiota: A Comparison of Small Subunit rRNA, ITS1, ITS2, and Large Subunit rRNA Genomic Targets
Source: PubMed Central journal article supplement (PMC6157398; doi:10.3389/fmicb.2018.02208), 2018-09-19
Supplement: Image_2.pdf [file Image_2.pdf]

(A)

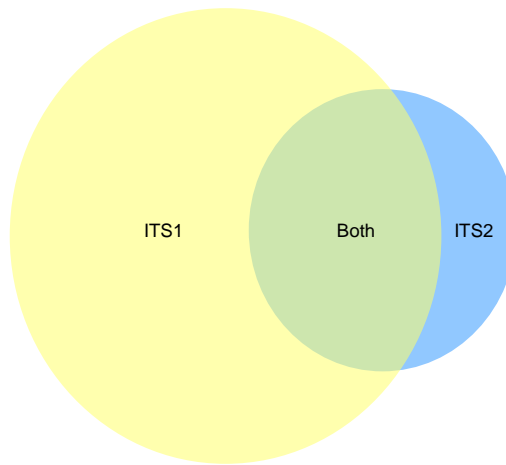

| ITS1 only                                              | shared                                             | ITS2 only                                         |
|--------------------------------------------------------|----------------------------------------------------|---------------------------------------------------|
| p:Ascomycota,f:Mycosphaerellaceae_Unclassified         | <b>d:Fungi_Unclassified</b>                        | p:Ascomycota,g:Toxicocladosporium                 |
| p:Ascomycota,f:Teratosphaeriaceae_Unclassified         | <b>p:Ascomycota_Unclassified</b>                   | p:Ascomycota,g:Graphiopsis                        |
| p:Ascomycota,g:Devriesia                               | <b>p:Ascomycota,o:Capnodiales_Unclassified</b>     | p:Ascomycota,g:Peltaster                          |
| p:Ascomycota,g:Microcycluspora                         | <b>p:Ascomycota,g:Cladosporium</b>                 | <b>p:Ascomycota,o:Pleosporales_Unclassified</b>   |
| p:Ascomycota,g:Paraphoma                               | <b>p:Ascomycota,g:Davidiella</b>                   | p:Ascomycota,f:Tubeufiaceae_Unclassified          |
| p:Ascomycota,f:Montagnulaceae_Unclassified             | p:Ascomycota,g:Mycosphaerella                      | p:Ascomycota,g:Petromyces                         |
| p:Ascomycota,g:Preussia                                | <b>p:Ascomycota,g:Kabatiella</b>                   | p:Ascomycota,f:Orbiliaceae_Unclassified           |
| p:Ascomycota,c:Eurotiomycetes_Unclassified             | p:Ascomycota,f:Didymellaceae_Unclassified          | p:Ascomycota,g:Clavisporea                        |
| p:Ascomycota,f:Herpotrichiellaceae_Unclassified        | p:Ascomycota,g:Leptosphaerulina                    | p:Ascomycota,g:Microascus                         |
| p:Ascomycota,g:Phialophora                             | p:Ascomycota,g:Cladophialophora                    | p:Basidiomycota,g:Hemimycena                      |
| p:Ascomycota,f:Trichocomaceae_Unclassified             | <b>p:Ascomycota,g:Exophiala</b>                    | p:Basidiomycota,g:Hyphodontia                     |
| p:Ascomycota,g:Arthroderma/Trichophyton                | <b>p:Ascomycota,g:Aspergillus</b>                  | p:Basidiomycota,f:Peniophoraceae_Unclassified     |
| p:Ascomycota,g:Erysiphe                                | <b>p:Ascomycota,g:Penicillium/Eupenicillium</b>    | p:Basidiomycota,c:Microbotryomycetes_Unclassified |
| p:Ascomycota,g:Dokmaia                                 | p:Ascomycota,g:Pichia                              |                                                   |
| p:Ascomycota,g:Knufia                                  | <b>p:Ascomycota,g:Debaryomyces</b>                 |                                                   |
| p:Ascomycota,o:Saccharomycetales_Unclassified          | <b>p:Ascomycota,g:Candida</b>                      |                                                   |
| p:Ascomycota,g:Meyerozyma                              | <b>p:Ascomycota,g:Thielaviopsis</b>                |                                                   |
| p:Ascomycota,g:Lodderomyces                            | p:Basidiomycota_Unclassified                       |                                                   |
| p:Ascomycota,c:Sordariomycetes_Unclassified            | p:Basidiomycota,c:Agaricomycetes_Unclassified      |                                                   |
| p:Ascomycota,o:Hypocreales_Unclassified                | p:Basidiomycota,g:Tricholoma                       |                                                   |
| p:Ascomycota,f:Hypocreales_Incertae_sedis_Unclassified | p:Basidiomycota,g:Rhizoctonia/Ceratobasidium       |                                                   |
| p:Ascomycota,f:Nectriaceae_Unclassified                | p:Basidiomycota,g:Trametes                         |                                                   |
| p:Ascomycota,g:Gibberella                              | <b>p:Basidiomycota,g:Rhodotorula/Rhodosporeium</b> |                                                   |
| p:Ascomycota,g:Plectosphaerella                        | p:Basidiomycota,g:Mrakia                           |                                                   |
| p:Ascomycota,g:Pestalotiopsis                          | <b>p:Basidiomycota,g:Filobasidium</b>              |                                                   |
| p:Basidiomycota,o:Agaricales_Unclassified              | p:Basidiomycota,o:Tremellales_Unclassified         |                                                   |
| p:Basidiomycota,g:Agaricus                             | <b>p:Basidiomycota,g:Tryptococcus</b>              |                                                   |
| p:Basidiomycota,g:Pleurotus                            | <b>p:Basidiomycota,g:Filobasidiella</b>            |                                                   |
| p:Basidiomycota,g:Scleroderma                          | <b>p:Basidiomycota,g:Trichosporon</b>              |                                                   |
| p:Basidiomycota,g:Sullius                              | <b>p:Basidiomycota,g:Malassezia</b>                |                                                   |
| p:Basidiomycota,o:Polyporales_Unclassified             | <b>p:Basidiomycota,g:Walleimia</b>                 |                                                   |
| p:Basidiomycota,g:Ganoderma                            |                                                    |                                                   |
| p:Basidiomycota,g:Phlebia                              |                                                    |                                                   |
| p:Basidiomycota,g:Junghuhnia                           |                                                    |                                                   |
| p:Basidiomycota,g:Peniophora                           |                                                    |                                                   |
| p:Basidiomycota,g:Leucosporidium                       |                                                    |                                                   |
| p:Basidiomycota,g:Sporidobolus                         |                                                    |                                                   |
| p:Basidiomycota,g:Sporobolomyces                       |                                                    |                                                   |
| p:Basidiomycota,g:Cystofilobasidium                    |                                                    |                                                   |
| p:Basidiomycota,g:Guehomyces                           |                                                    |                                                   |

(B)

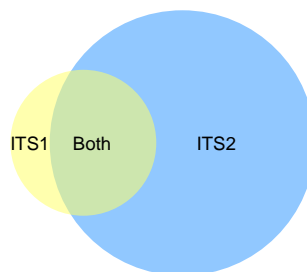

| ITS1 only                            | shared                                     | ITS2 only                                       |
|--------------------------------------|--------------------------------------------|-------------------------------------------------|
| p:Ascomycota,g:Hypocrea              | d:Fungi_Unclassified                       | <b>p:Ascomycota,o:Pleosporales_Unclassified</b> |
| p:Basidiomycota,g:Psathyrella        | <b>p:Ascomycota,g:Davidiella</b>           | <b>p:Ascomycota,g:Leptosphaerulina</b>          |
| <b>p:Basidiomycota,g:Rigidoporus</b> | <b>p:Ascomycota,g:Thermomyces</b>          | p:Ascomycota,g:Dictyosporium                    |
|                                      | <b>p:Ascomycota,g:Aspergillus/Eurotium</b> | p:Ascomycota,f:Trichocomaceae_Unclassified      |
|                                      | p:Ascomycota,g:Debaryomyces                | <b>p:Ascomycota,g:Eupenicillium</b>             |
|                                      | p:Ascomycota,g:Gibellulopsis               | p:Ascomycota,g:Paecilomyces                     |
|                                      | p:Basidiomycota_Unclassified               | p:Ascomycota,g:Candida                          |
|                                      | <b>p:Basidiomycota,g:Clitopilus</b>        | p:Ascomycota,o:Hypocreales_Unclassified         |
|                                      | <b>p:Basidiomycota,g:Cystofilobasidium</b> | p:Ascomycota,g:Khuskia/Nigrospora               |
|                                      |                                            | p:Basidiomycota,c:Agaricomycetes_Unclassified   |
|                                      |                                            | p:Basidiomycota,o:Agaricales_Unclassified       |
|                                      |                                            | p:Basidiomycota,g:Mycena                        |
|                                      |                                            | <b>p:Basidiomycota,g:Rhodotorula</b>            |

**Image 2.** ITS1 and ITS2 community coverage for sinonasal and mouse fecal samples. Lists of unique taxonomic assignments and Venn diagrams representing the number of each taxa identified by ITS1 only (yellow), ITS2 only (blue), or both (green), for **(A)** human sinonasal, and **(B)** mouse fecal samples, with taxonomic assignments based on RDP ITS reference database. The 20 (sinonasal) and 10 (mouse fecal) most abundant taxa for each are given in bold.
